# Supplementary material
Source: PubMed Central journal article supplement (PMC6664296)
Supplement: NIHMS1532877-supplement-1.pdf [file NIHMS1532877-supplement-1.pdf]

**Cell Reports, Volume 27**

**Supplemental Information**

**Metallothionein 3 Controls the Phenotype  
and Metabolic Programming  
of Alternatively Activated Macrophages**

**Debabrata Chowdhury, Hani Alrefai, Julio A. Landero Figueroa, Kathleen Candor, Aleksey Porollo, Roger Fecher, Senad Divanovic, George S. Deepe Jr., and Kavitha Subramanian Vignesh**

## Supplementary Figures and Figure Legend:

**Figure S1:**

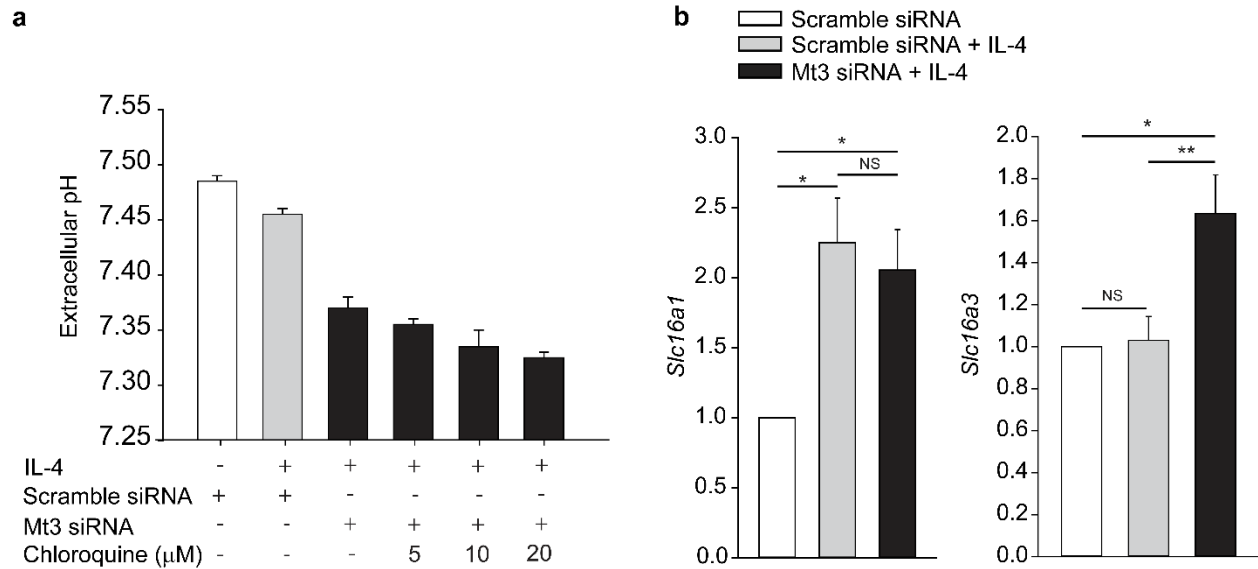

**Figure S1: Effect of chloroquine on extracellular acidification and impact of MT3 on lactate transporter gene expression. Related to Figure 2.**

**(a)** Scramble siRNA or Mt3 siRNA treated Mφ exposed to chloroquine and stimulated with IL-4 for 24 h, 2 independent experiments; and **(b)** Gene expression of monocarboxylic acid transporters *Slc16a1* (MCT1) and *Slc16a3* (MCT4) in *Mt3<sup>-/-</sup>* Mφ 24 h post IL-4 stimulation, 5 independent experiments, One-way ANOVA (Holm-Sidak method). Data represent mean ± SEM, One-Way ANOVA, \**p* < 0.05, \*\**p* < 0.01 and NS, not significant. (See also Figure 2).

**Figure S2:**

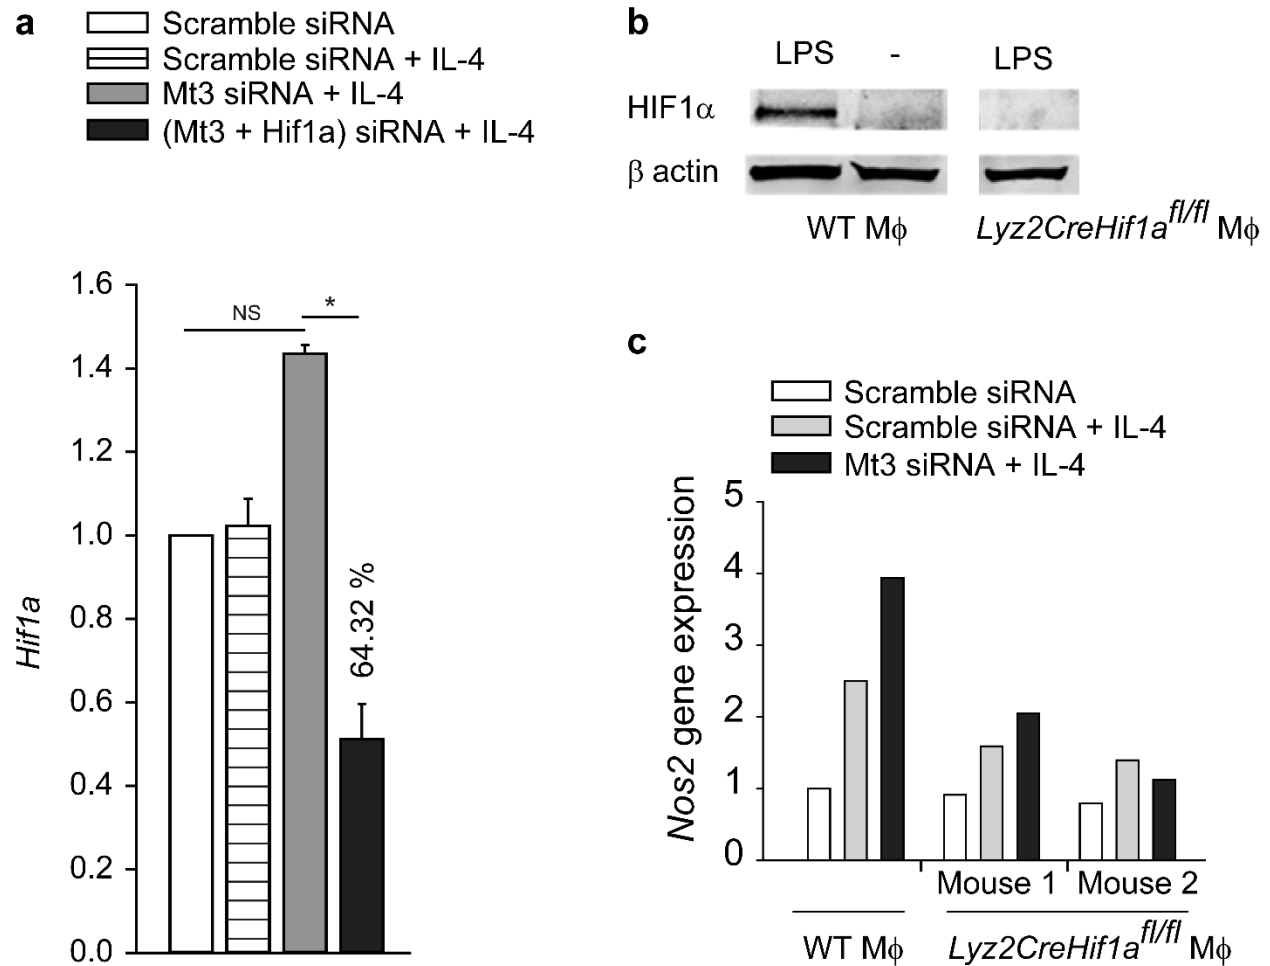

**Figure S2: *Hif1a* silencing and analysis of the effect of MT3 in *Lyz2CreHif1a<sup>fl/fl</sup>* Mφ.**

**Related to Figure 3.**

**(a)** *Hif1a* expression in M(IL-4) Mφ treated with either *Hif1a* siRNA or scramble siRNA control. Percent value represents *Hif1a* silencing in (Mt3 + *Hif1a*) siRNA treated Mφ compared to Mt3 siRNA alone; 4 independent experiments, ANOVA on Ranks (Dunn's method), data represent mean ± SEM, \*p < 0.05 and NS, not significant; **(b)** Western blot of HIF1α from WT and *Lyz2CreHIF1a<sup>fl/fl</sup>* Mφ left untreated or treated with LPS (100ng/ml)

for 4h,  $\beta$  actin used as loading control, one representative of 4 independent experiments, the bands are from a single western blot, but the lanes were separated to only present data from relevant samples; **(c)** *Nos2* gene expression in WT and *Lyz2CreHif1a<sup>fl/fl</sup>* M $\phi$  treated with scramble or Mt3 siRNA and stimulated with IL-4 for 24h, data from each *Lyz2CreHIF1a<sup>fl/fl</sup>* mouse is shown separately (See also Figure 3).

**Figure S3:**

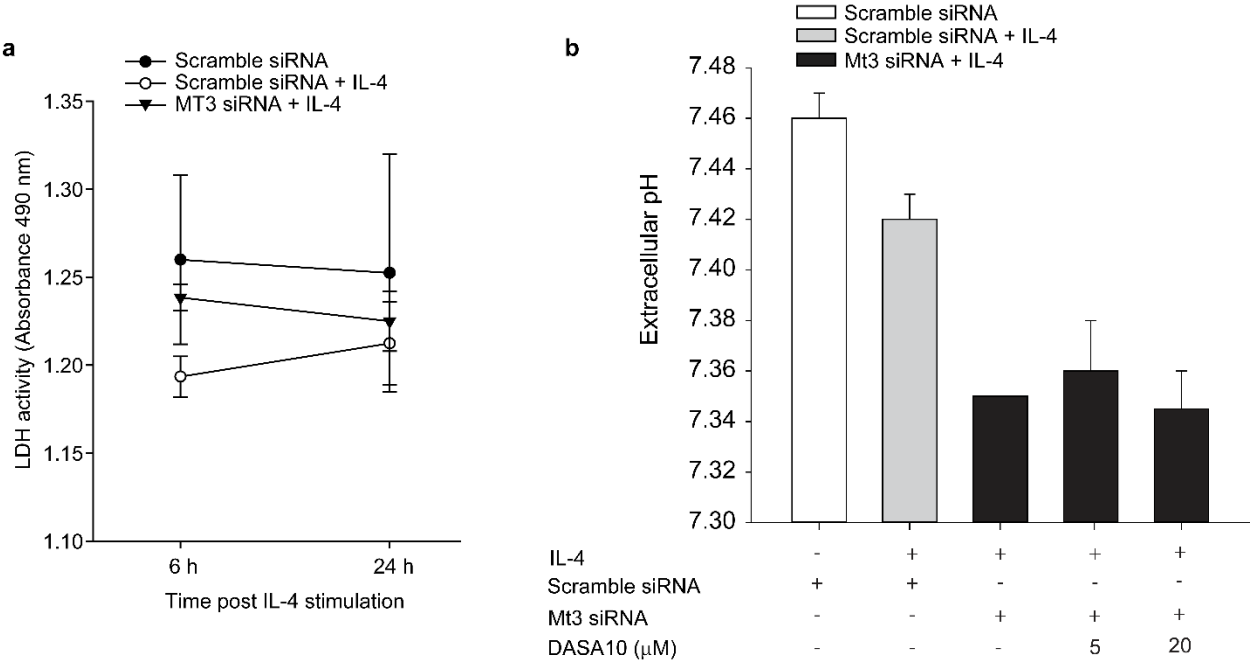

**Figure S3: LDH activity in M $\phi$  and PKM2 activation does not rescue extracellular acidosis in MT3 deficient M $\phi$ . Related to Figure 4.**

**(a)** Analysis of LDH activity in cell lysates of scramble siRNA or Mt3 siRNA treated M $\phi$ , 6 h and 24 h post IL-4 stimulation; 2 independent experiments; and **(b)** Extracellular pH in culture supernatants of M $\phi$  treated with DMSO control or DASA-10 throughout the culture period and stimulated with IL-4 for 24 h; 4 independent experiments, Data represent mean  $\pm$  SEM. (See also Figure 4).

**Figure S4:**

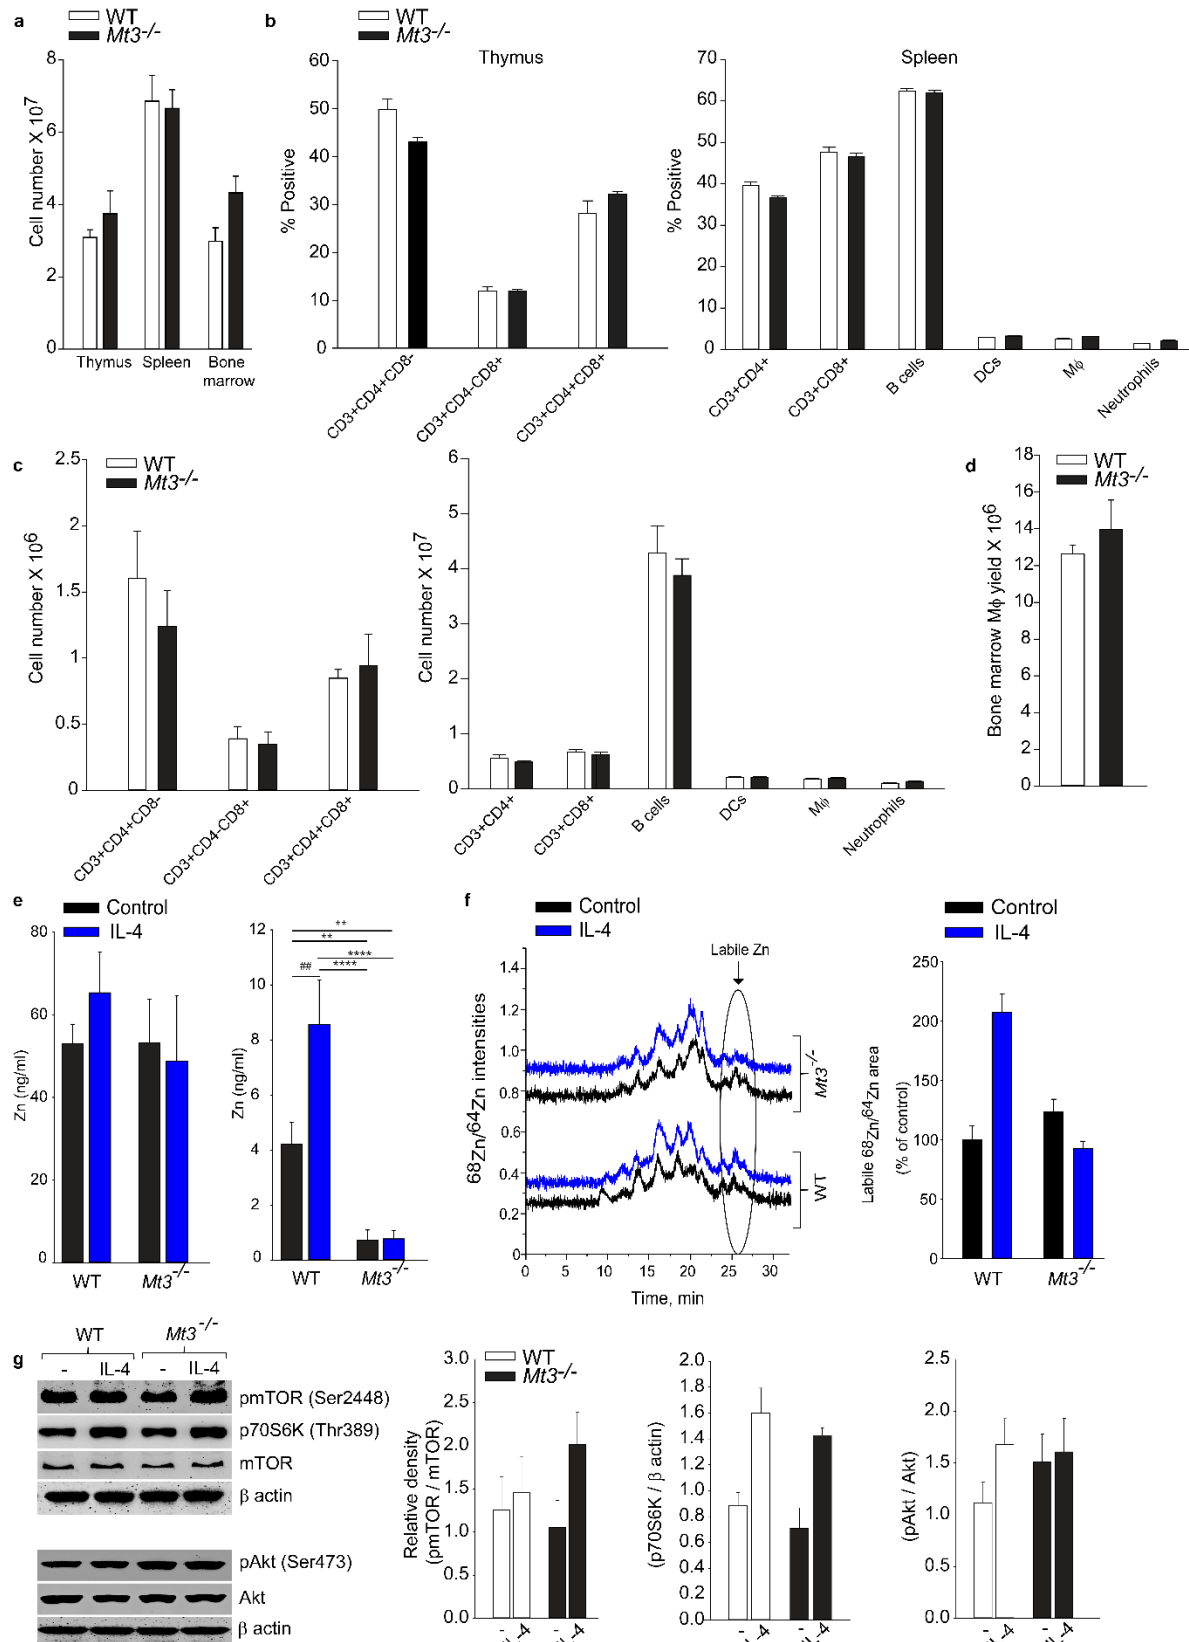

**Figure S4: Phenotyping of WT and *Mt3*<sup>-/-</sup> mice, Zn changes and Akt, mTOR activation in WT and *Mt3*<sup>-/-</sup> Mφ. Related to Figure 5.**

**(a)** Cell numbers in the thymus, spleen and bone marrow of *Mt3*<sup>-/-</sup> mice and age-matched wild type (WT) control mice; **(b and c)** Proportion and number of thymic T cells, splenic T and B cells, dendritic cells (DCs), Mφ, and neutrophils of WT and *Mt3*<sup>-/-</sup> mice; **(d)** Number of WT and *Mt3*<sup>-/-</sup> bone marrow derived Mφ obtained by GM-CSF differentiation, data represent mean ± SEM; **(e)** Size exclusion chromatography-inductively coupled plasma-mass spectrometry (SEC-ICP-MS-MS) analysis of WT and *Mt3*<sup>-/-</sup> bone marrow derived Mφ stimulated with IL-4 for 24 h in regular RPMI media, bar graphs show total Zn (left) and labile Zn (right), 3 independent experiments, One-way ANOVA (Bonferroni method); **(f)** SEC-ICP-MS-MS analysis of WT and *Mt3*<sup>-/-</sup> bone marrow derived Mφ stimulated with IL-4 for 24 h in <sup>68</sup>Zn enriched RPMI media prepared as described (Subramanian Vignesh et al., 2016). Chromatogram on left shows ratio of <sup>68</sup>Zn / <sup>64</sup>Zn in Mφ lysates, labile Zn signal (circled region) seen at >25 min in the chromatogram, Y axis, offset for clarity, an increase in <sup>68</sup>Zn / <sup>64</sup>Zn ratio indicates an elevation in newly imported <sup>68</sup>Zn in the Mφ; bar graph on right shows labile <sup>68</sup>Zn / <sup>64</sup>Zn ratio in untreated and IL-4 treated WT and *Mt3*<sup>-/-</sup> Mφ. The data show that IL-4 fails to elevate labile <sup>68</sup>Zn / <sup>64</sup>Zn ratio when MT3 is absent, data represent mean ± SD, 2 independent experiments; and **(g)** Western Blot of pAkt, Akt, pmTOR, mTOR, p70S6K and β-actin in total cell lysates of WT and *Mt3*<sup>-/-</sup> Mφ 24 h post IL-4 stimulation, pAkt, pmTOR and p70S6K were normalized to Akt, mTOR and β-actin respectively, 3 independent experiments (See also Figure 5).

**Figure S5:**

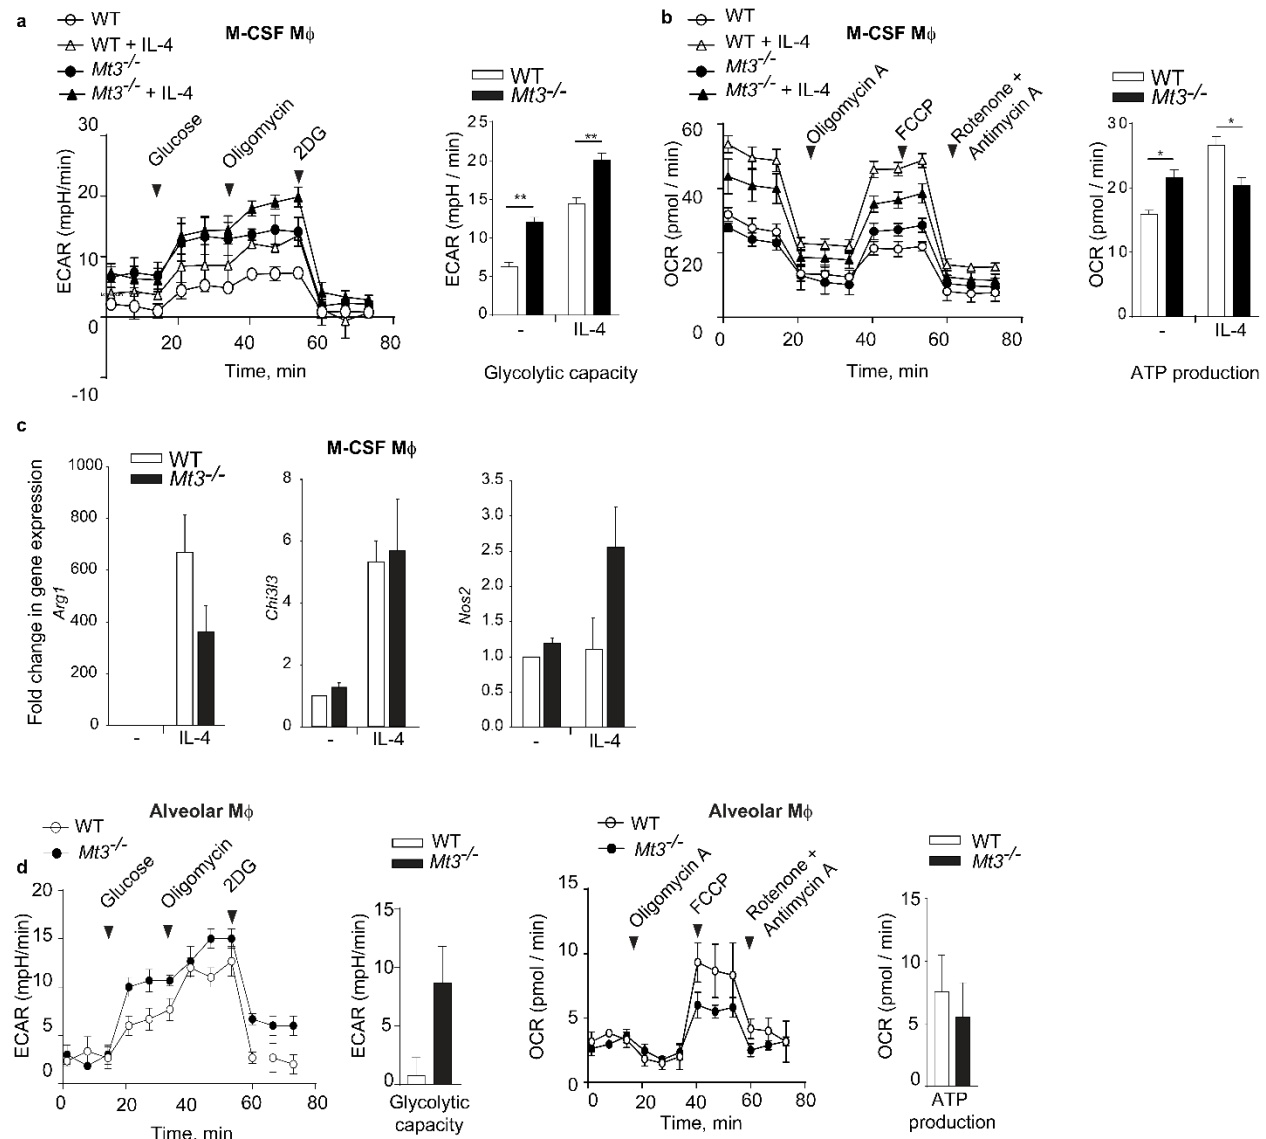

**Figure S5: MT3 regulates M $\phi$  metabolism in M-CSF derived M $\phi$  and in alveolar M $\phi$ .**

**Related to Figure 5.**

**(a and b)** ECAR and OCR plots of bone marrow derived WT and *Mt3*<sup>-/-</sup> M $\phi$  differentiated using M-CSF, followed by no treatment or stimulation with IL-4 for 24 h, bar graphs (right)

show ATP production and glycolytic capacity, 3 independent experiments, One-way ANOVA (Tukey method); **(c)** Gene expression analysis of *Arg1*, *Chi3l3* and *Nos2* in WT and *Mt3<sup>-/-</sup>* M-CSF derived M $\phi$  left untreated or treated with IL-4 for 24 h; and **(d)** ECAR and OCR plots of alveolar M $\phi$  from WT and *Mt3<sup>-/-</sup>* M $\phi$ , bar graph (right) shows ATP production and glycolytic capacity, 3 independent experiments; two-way ANOVA (Holm Sidak method); data represent mean  $\pm$  SEM (See also Figure 5).

**Figure S6:**

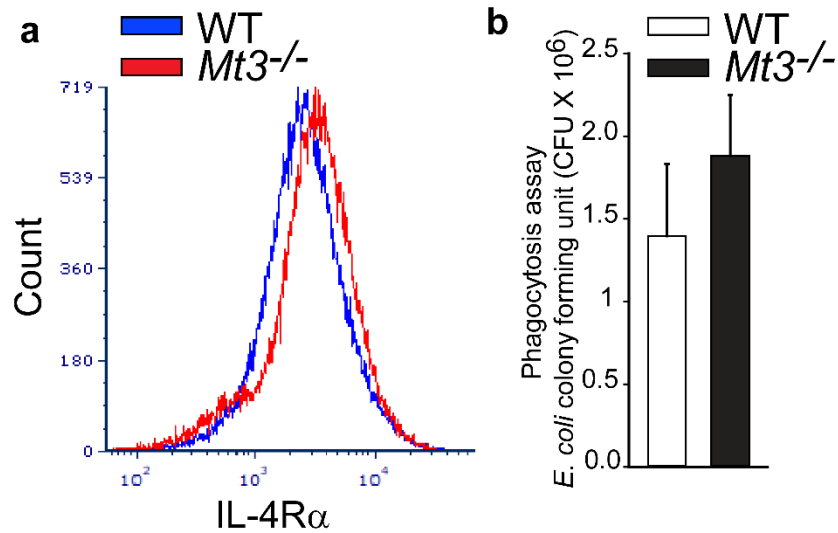

**Figure S6: IL-4R $\alpha$  expression in *Mt3*<sup>-/-</sup> M $\phi$  and *E. coli* phagocytosis. Related to Figure 6.**

**(a)** Dot plots showing IL-4R $\alpha$  expression in WT and *Mt3*<sup>-/-</sup> M $\phi$  at baseline, 3 independent experiments; and **(b)** Phagocytosis of *E. coli* K12 by WT and *Mt3*<sup>-/-</sup> M $\phi$  3.5 h post infection, data are presented as CFU, 4 independent experiments. Data represent mean  $\pm$  SEM. (See also Figure 6).
